# Supplementary material
Source: Springer Nature journal article supplement (https://www.springermedizin.de/resource/supplementary/12889_2012_5441_MOESM1_ESM.pdf/9495286)

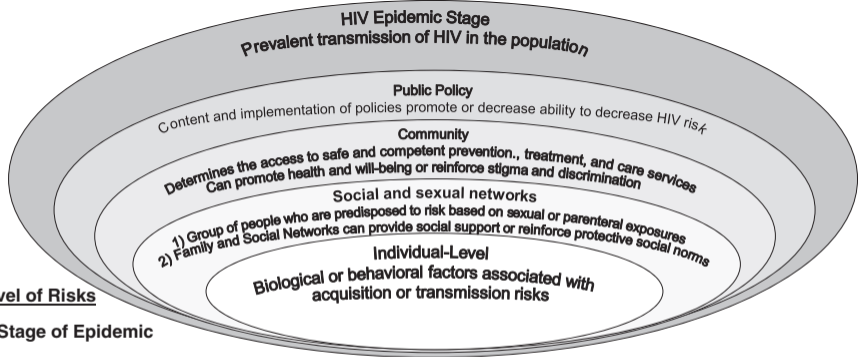

Level of Risks

|  |                   |
|--|-------------------|
|  | Stage of Epidemic |
|  | Public Policy     |
|  | Community         |
|  | Network           |
|  | Individual        |

Supplement: MOESM1 [file 9495286]
